# Supplementary material
Source: Springer Nature journal article supplement (https://www.springermedizin.de/resource/supplementary/12889_2014_6591_MOESM3_ESM.pdf/9498636)

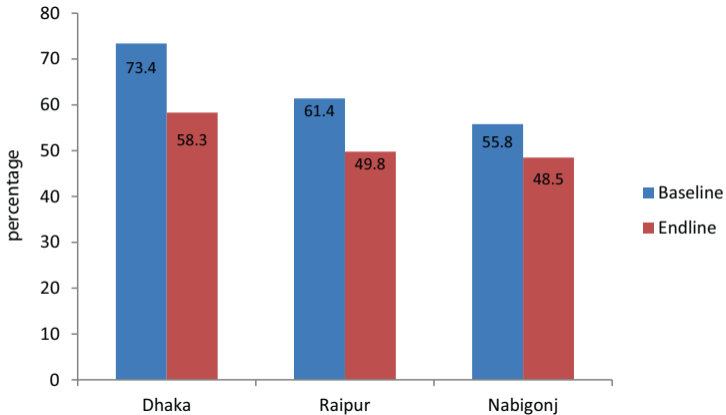

Supplement: MOESM3 [file 9498636]
